# Supplementary material for: Differentiation of Human Tonsil-Derived Mesenchymal Stem Cells into Schwann-Like Cells Improves Neuromuscular Function in a Mouse Model of Charcot-Marie-Tooth Disease Type 1A
Source: MDPI journal article supplement (doi:10.3390/ijms19082393), 2018-08-14
Supplement: s1 [file s1]

## Supplementary materials

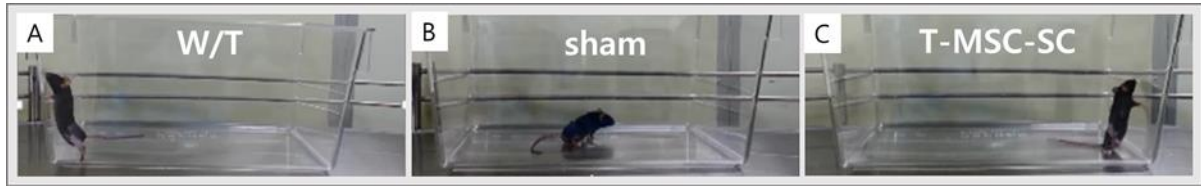

**Figure S1.** Restoration by the transplantation of Schwann cells differentiated from human T-MSCs into trembler-J (Tr-J) mice. Some 12 weeks after transplantation of T-MSC-SC, the Tr-J mice became stronger on their hind legs and they could stand up with their forelimbs holding the wall of their cage (C) as the wild-type mouse could (A). There was no change in the sham group mice (B) at 12 weeks after they were injected with PBS.
